# Supplementary material
Source: PubMed Central journal article supplement (PMC3910741)
Supplement: AAC.01407-13_zac001142466so1.pdf [file AAC.01407-13_zac001142466so1.pdf]

Supplemental Figure S1

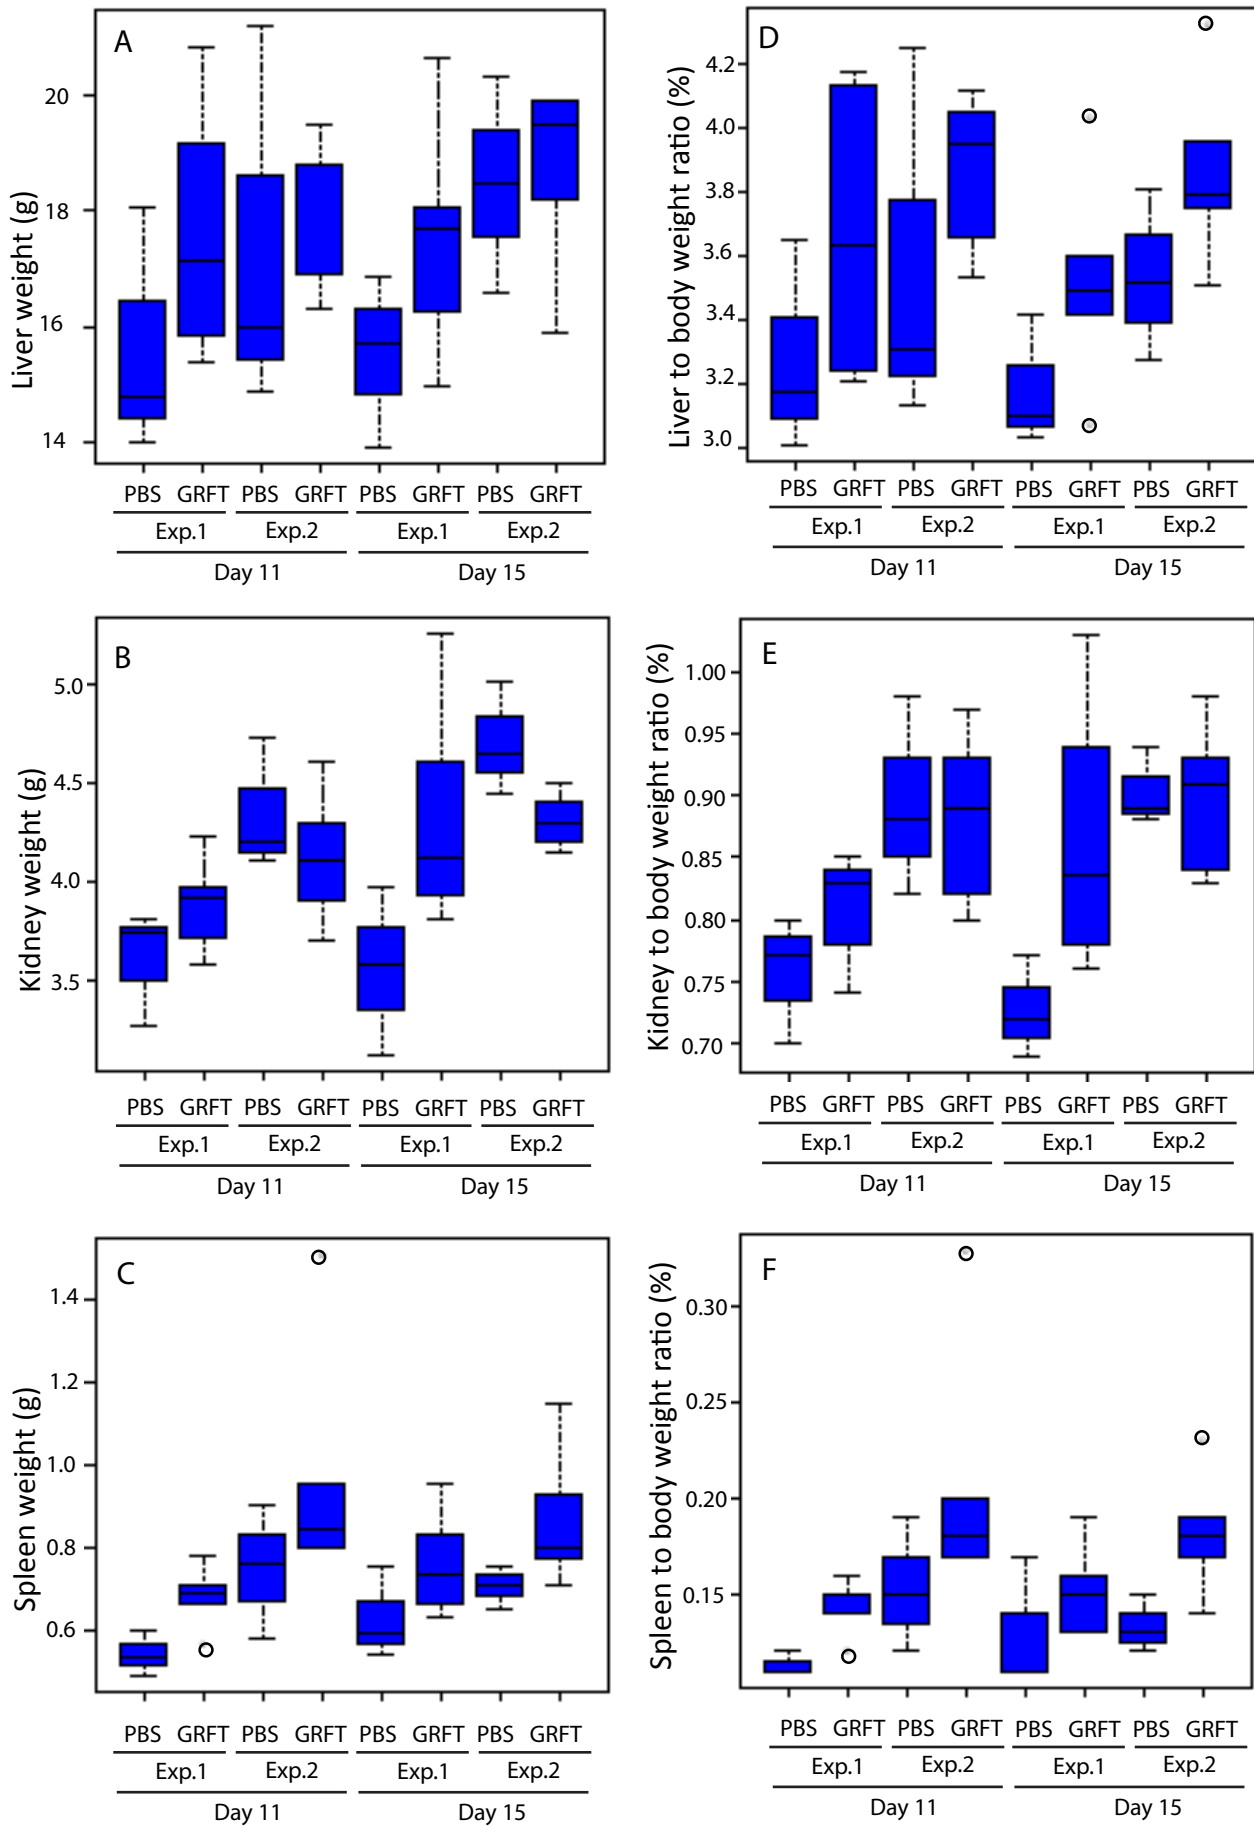

Supplemental Figure S1. Effect of GRFT on guinea pig organ weights. Absolute weights of liver (A), kidney (B), and spleen (C) after treatment with GRFT or PBS are presented as box-plots together with corresponding organ to body weight ratios (D-F). Significance is indicated by circles as determined by a 3 way-ANOVA.

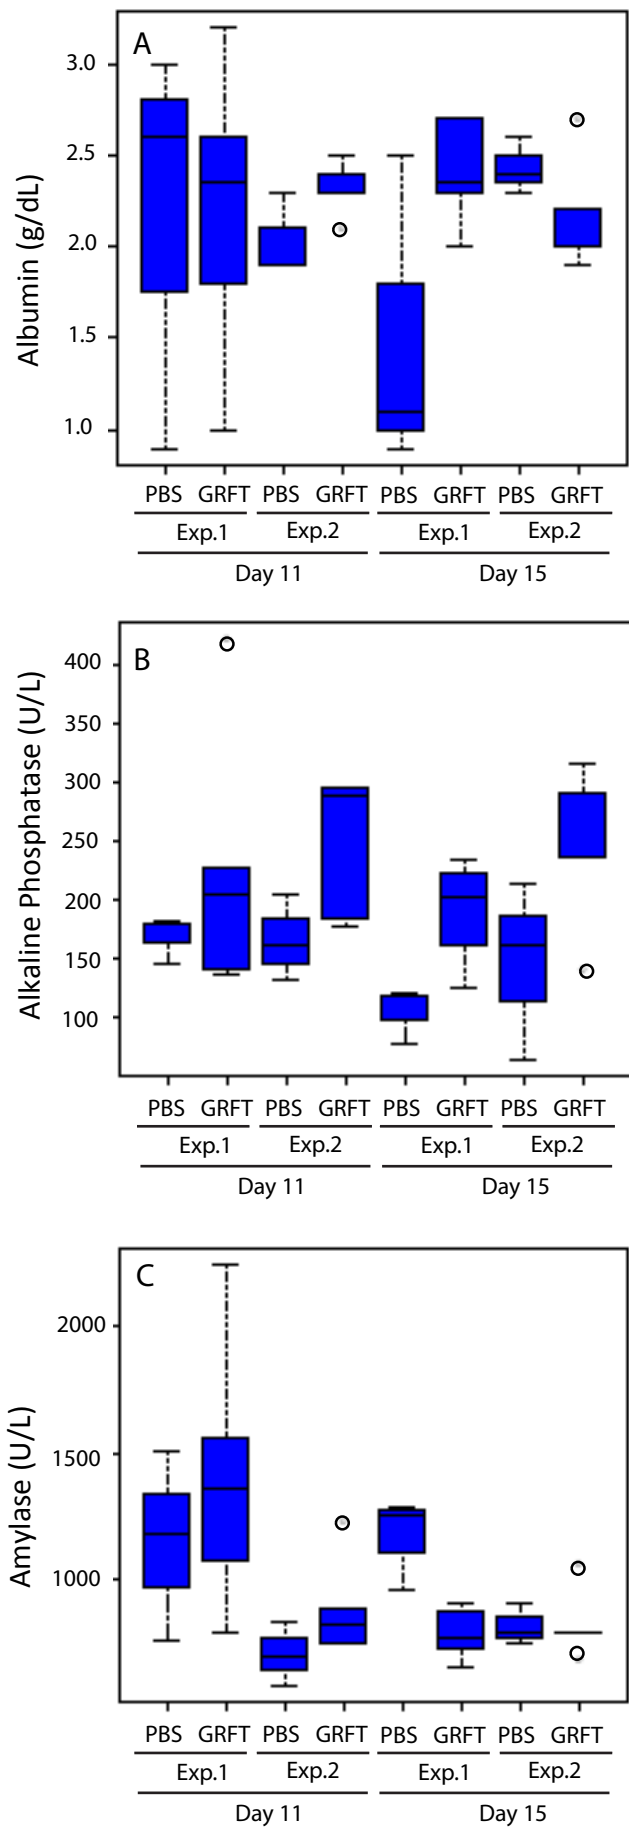

Supplemental Figure S2. Effect of GRFT on guinea pig serum chemistry markers of toxicity. A, albumin; B, alkaline phosphatase; C, amylase. Data are presented as box-plots and significance is indicated by circles as determined by a 3 way-ANOVA.

Supplemental Figure S3

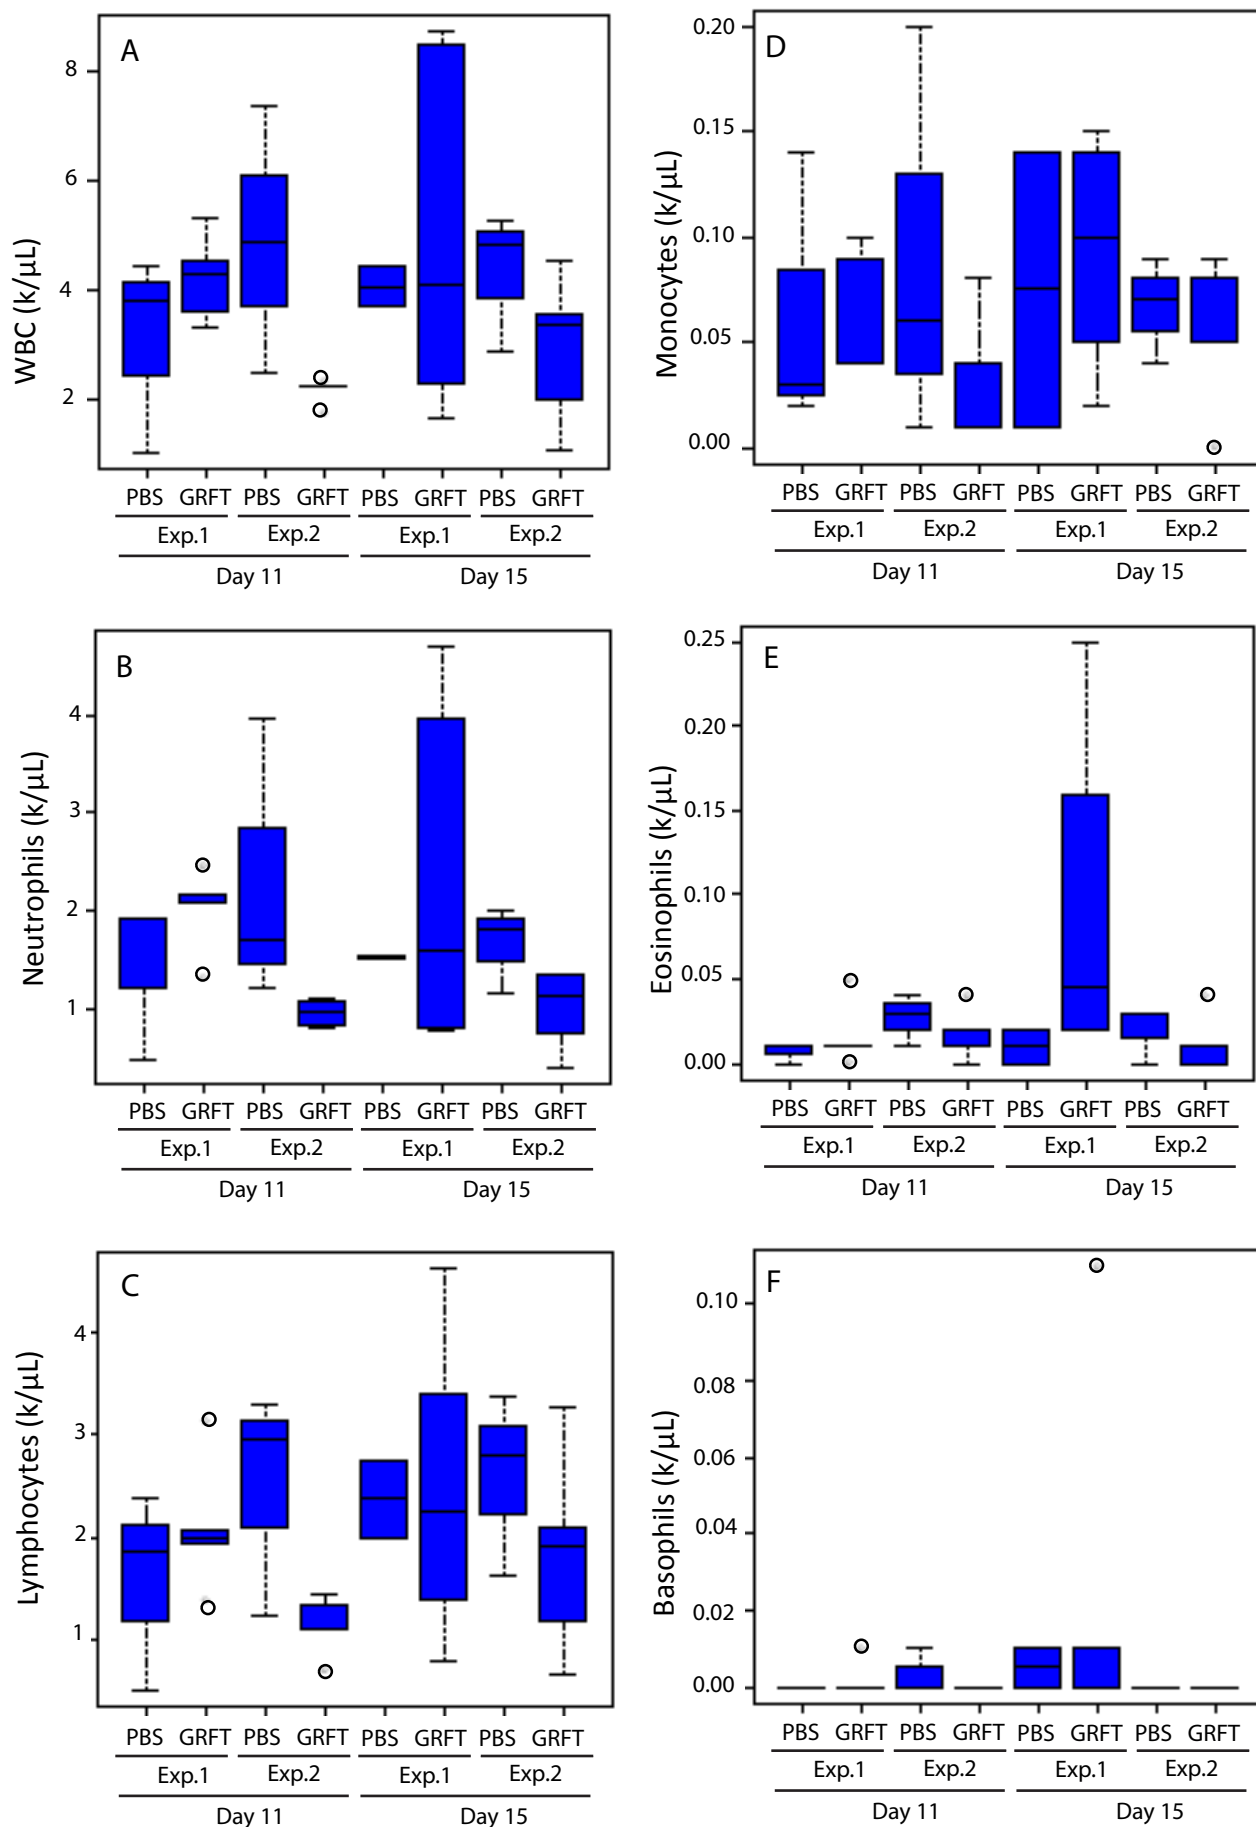

Supplemental Figure S3. Effect of GRFT on white blood cell (WBC) content in guinea pigs. A, total WBC; B, neutrophils; C, lymphocytes; D, monocytes; E, eosinophils; F, basophils. Data are presented as box-plots and significance is indicated by circles as determined by a 3 way-ANOVA.

Supplemental Figure S4

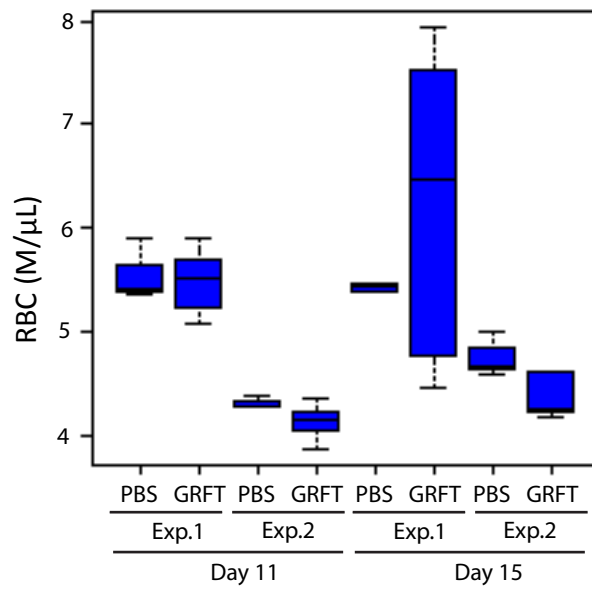

Supplemental Figure S4. Effect of GRFT on red blood cell (RBC) number in guinea pigs. Data are presented as box-plots.

Supplemental Figure S5

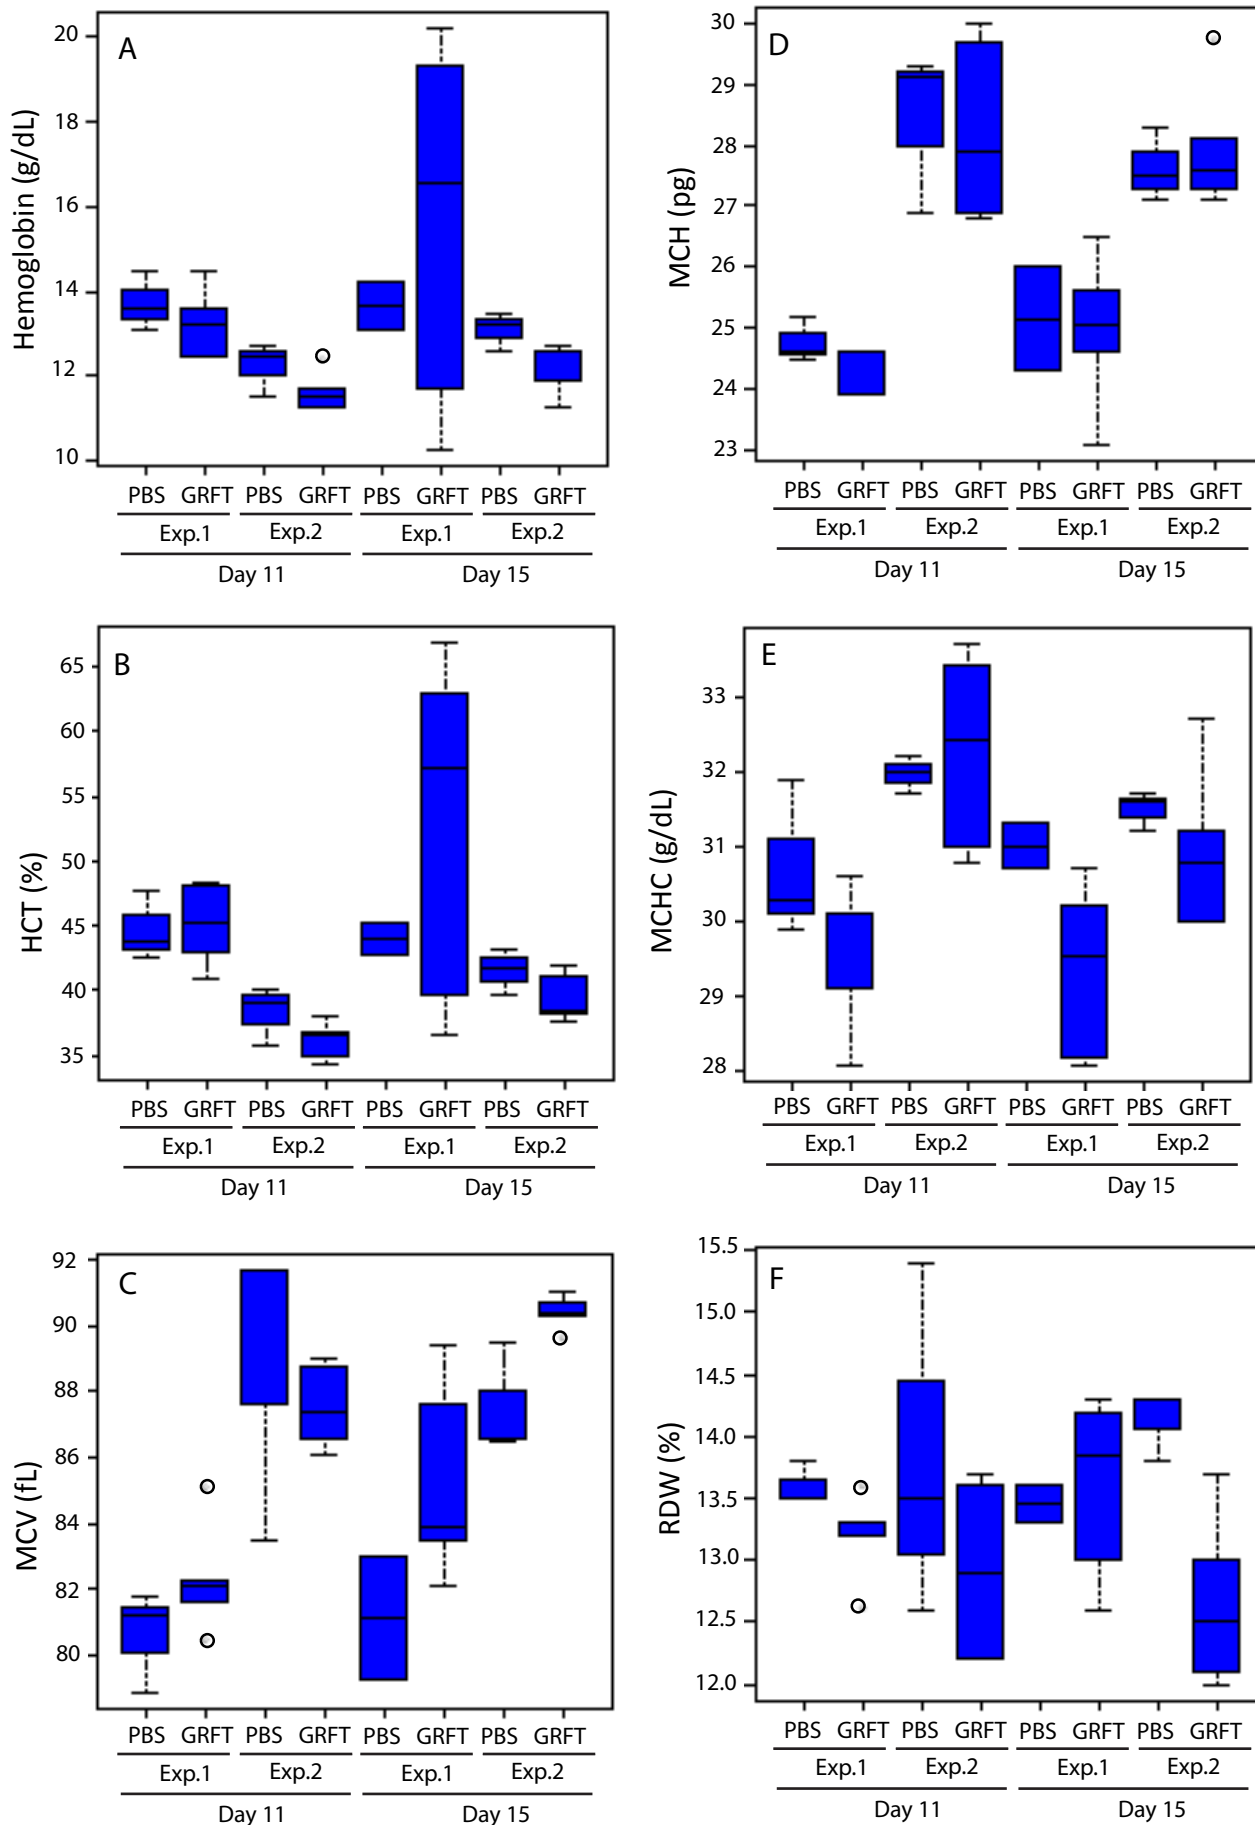

Supplemental Figure S5. Effect of GRFT on red blood cell (RBC) properties in guinea pigs. A, hemoglobin; B, hematocrit (HCT); C, mean corpuscular volume (MCV); D, mean cell hemoglobin (MCH); E, mean cell hemoglobin concentration (MCHC); F, red cell distribution width (RDW). Data are presented as box-plots and significance is indicated by circles as determined by a 3 way-ANOVA.

Supplemental Figure S6

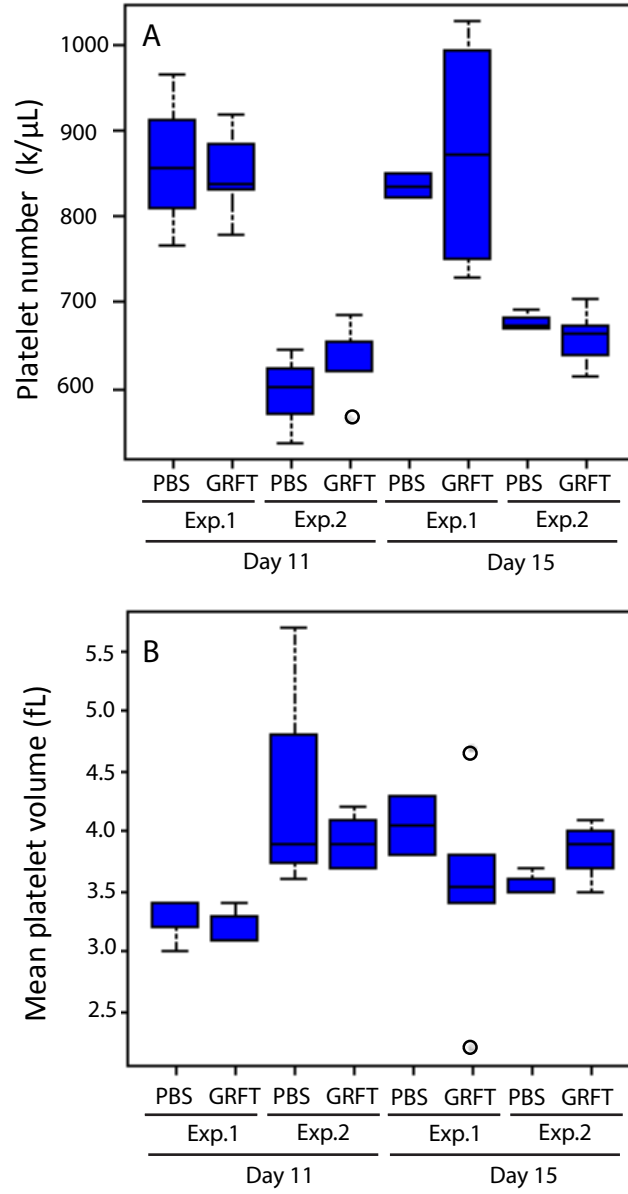

Supplemental Figure S6. Effect of GRFT on platelet number (A) and mean platelet volume (B). Data are presented as box-plots and significance is indicated by circles as determined by a 3 way-ANOVA.

Supplemental Table S1. Serum Chemistry values for Guinea Pig Experiment 1.

Treatment p values were obtained by a two way ANOVA.

| Parameter | Unit  | Day 11         |                | Day 15         |              | Treatment P-value |
|-----------|-------|----------------|----------------|----------------|--------------|-------------------|
|           |       | PBS (N=3)      | GRFT (N=6)     | PBS (N=3)      | GRFT N=6)    |                   |
| ALB       | g/dL  | 2.2 ± 1.1      | 2.2 ± 0.7      | 1.5 ± 0.9      | 2.4 ± 0.3    | 0.21              |
| ALKP      | U/L   | 169.3 ± 19.4   | 223.8 ± 105.4  | 105.0 ± 24.3   | 191.8 ± 41.0 | 0.59              |
| ALT       | U/L   | 72.7 ± 16.5    | 103.5 ± 35.4   | 62.3 ± 26.4    | 50.3 ± 10.7  | 0.71              |
| AMYL      | U/L   | 1146.3 ± 375.8 | 1399.3 ± 506.2 | 1166.0 ± 181.7 | 781.8 ± 98.3 | 0.46              |
| BUN       | mg/dL | 21.3 ± 3.8     | 27.0 ± 4.1     | 23.3 ± 2.1     | 25.8 ± 4.3   | 0.05              |
| Ca        | mg/dL | 14.1 ± 3.2     | 14.1 ± 3.5     | 12.3 ± 0.7     | 11.8 ± 0.4   | 0.83              |
| CHOL      | mg/dL | 33.3 ± 3.2     | 58.5 ± 25.1    | 38.7 ± 38.5    | 67.3 ± 22.2  | 0.07              |
| CREA      | mg/dL | 0.3 ± 0.0      | 0.3 ± 0.0      | 0.2 ± 0.2      | 0.3 ± 0.0    | 0.03              |
| GLOB      | g/dL  | 3.9 ± 1.4      | 3.8 ± 1.3      | 3.3 ± 0.8      | 2.6 ± 0.2    | 0.45              |
| GLU       | mg/dL | 209.7 ± 54.9   | 229.3 ± 57.1   | 200.7 ± 28.6   | 218.5 ± 26.1 | 0.41              |
| PHOS      | mg/dL | 7.3 ± 2.3      | 6.2 ± 0.9      | 5.9 ± 1.0      | 6.6 ± 0.8    | 0.73              |
| TBIL      | mg/dL | 0.2 ± 0.1      | 0.2 ± 0.1      | 0.2 ± 0.1      | 0.1 ± 0.0    | 0.13              |
| TP        | g/dL  | 6.0 ± 2.0      | 6.0 ± 1.5      | 4.8 ± 0.4      | 5 ± 0.4      | 0.89              |
